## RESEARCH ARTICLE

# COP9 signalosome subunits protect Capicua from MAPK-dependent and -independent mechanisms of degradation

Annabelle Suisse, DanQing He, Kevin Legent\* and Jessica E. Treisman<sup>‡</sup>**ABSTRACT**

The COP9 signalosome removes Nedd8 modifications from the Cullin subunits of ubiquitin ligase complexes, reducing their activity. Here, we show that mutations in the *Drosophila* COP9 signalosome subunit 1b (*CSN1b*) gene increase the activity of ubiquitin ligases that contain Cullin 1. Analysis of *CSN1b* mutant phenotypes revealed a requirement for the COP9 signalosome to prevent ectopic expression of Epidermal growth factor receptor (EGFR) target genes. It does so by protecting Capicua, a transcriptional repressor of EGFR target genes, from EGFR pathway-dependent ubiquitylation by a Cullin 1/SKP1-related A/Archipelago E3 ligase and subsequent proteasomal degradation. The *CSN1b* subunit also maintains basal Capicua levels by protecting it from a separate mechanism of degradation that is independent of EGFR signaling. As a suppressor of tumor growth and metastasis, Capicua may be an important target of the COP9 signalosome in cancer.

**KEY WORDS:** Capicua, COP9 signalosome, *Drosophila melanogaster*, EGFR, Nedd8, Ubiquitin ligase, Wing disc

**INTRODUCTION**

Regulation of protein stability is an important feature of many signaling pathways. Crucial pathway components can be constitutively degraded in the absence of the signal, or signaling can induce the removal of inhibitors of pathway function. Protein stability is often regulated by post-translational modifications that affect protein recognition by ubiquitin ligases. Polyubiquitylation targets these proteins for degradation by the 26S proteasome. Compared with reversible post-translational modifications, such as phosphorylation, the regulation of signaling pathways by protein degradation is long lasting and irreversible (Hunter, 2007; Lim et al., 2013).

Ubiquitin ligases themselves are also regulated by post-translational modifications. One such modification is addition of the small ubiquitin-like protein Nedd8 to Cullin proteins, the scaffolding subunits of Cullin-RING E3 ubiquitin ligase complexes (CRLs) (Merlet et al., 2009). Neddylation is required for the activity of these complexes, as it induces a conformational change that allows the RING domain of Rbx1 (Roc1a in *Drosophila*) more flexibility to catalyze ubiquitin transfer (Boh et al., 2011; Saha and Deshaies, 2008). However, deneddylation of CRLs in the absence

of substrate is thought to prevent their auto-ubiquitylation and to allow adaptor subunit exchange (Pierce et al., 2013; Saha and Deshaies, 2008; Wu et al., 2005; Zhou et al., 2003). The COP9 signalosome (CSN), which catalyzes deneddylation, is an essential factor in this modification cycle (Lyapina et al., 2001). CSN is a nine-subunit complex (Rozen et al., 2015) that is evolutionarily related to the lid of the 26S proteasome; its enzymatic activity resides in the CSN5 subunit (Cope et al., 2002; Pick and Bramasole, 2014). The CSN may also inhibit Cullin-based ubiquitin ligases non-catalytically, by directly binding to them and occluding sites for interaction with the substrate and ubiquitin-conjugating E2 enzyme (Enchev et al., 2012). However, recent structural and kinetic analyses show that deneddylated CRLs rapidly dissociate from the CSN (Cavadini et al., 2016; Mosadeghi et al., 2016). Other reported functions of the CSN and its associated proteins include phosphorylation, direct transcriptional regulation and de-ubiquitylation (Chamovitz, 2009; Wei and Deng, 2003). These activities make the CSN a major regulator of diverse cellular processes that include the cell cycle, the DNA damage response, gene expression and transduction of signals that depend on CRL activity, such as Hedgehog (Hh) and Wingless (Wg) (Wu et al., 2011; Schutz et al., 2012).

Epidermal growth factor receptor (EGFR) signaling controls cell growth, differentiation and survival in numerous contexts, and its misregulation contributes to many forms of cancer (Appert-Collin et al., 2015). Ligand binding to the EGFR leads to the activation of a kinase cascade, which culminates in phosphorylation of transcription factors by Mitogen-activated protein kinase (MAPK) (McKay and Morrison, 2007). MAPK phosphorylation activates transcriptional activators of EGFR target genes, including ETS family members, such as Pointed (Pnt) in *Drosophila*, and inactivates repressors, including the ETS protein Yan/TEL and the HMG-box protein Capicua (Cic) (Jimenez et al., 2012; O'Neill et al., 1994). Inactivation of Cic by EGFR signaling is essential to specify wing vein formation, which is prefigured by expression of *argos* (*aos*) in the wing imaginal disc (Roch et al., 2002). In the eye disc, EGFR signaling has a dual role, inactivating Cic to promote growth and activating Pnt to induce photoreceptor differentiation (Tseng et al., 2007; Yang and Baker, 2003). The human Cic homolog CIC acts as a suppressor of tumorigenesis and metastasis, consistent with a conserved function in growth regulation (Bettgowda et al., 2011; Dissanayake et al., 2011; Okimoto et al., 2016). In addition, CIC interactions with the corepressor Ataxin-1 may underlie the neurodegeneration defects in spinocerebellar ataxia (Lam et al., 2006; Lasagna-Reeves et al., 2015).

The mechanism by which receptor tyrosine kinase (RTK) signaling inactivates Cic is not fully understood. Activated MAPK phosphorylates Cic after binding to its conserved C2 domain; phosphorylation of potential target sites in human CIC interferes with binding of its nuclear localization signal to importin- $\alpha$  (Astigarraga et al., 2007; Dissanayake et al., 2011; Futran et al.,

Helen L. and Martin S. Kimmel Center at the Skirball Institute for Biomolecular Medicine and Department of Cell Biology, NYU School of Medicine, 540 First Avenue, New York, NY 10016, USA.

<sup>‡</sup>Present address: Teoxane Laboratories, 25 Boulevard Maiesherbes, 75008 Paris, France.

\*Author for correspondence (jessica.treisman@med.nyu.edu)

 K.L., 0000-0001-8547-0914; J.E.T., 0000-0002-7453-107X

Received 4 January 2017; Accepted 8 June 2017

2015). Consistent with this model, EGFR signaling results in cytoplasmic localization of Cic (Astigarraga et al., 2007), accompanied in some tissues by its degradation (Roch et al., 2002). It has been proposed that the primary event in Cic downregulation by the embryonic RTK Torso is its exclusion from the nucleus, as degradation occurs primarily in the cytoplasm (Grimm et al., 2012). However, inactivation of the repressor activity of Cic appears to precede its relocalization, at least in the early embryo (Lim et al., 2013). It is not known whether cytoplasmic localization or protein degradation is essential to neutralize Cic activity in response to RTK signaling.

We identified mutations in *CSN1b*, which encodes a subunit of the COP9 signalosome, based on phenotypes that reflected reduced levels of Cullin 1 (Cul1) substrates in the Hh and Wg signaling pathways (Janody et al., 2004). These data suggest that failure of deneddylation leads to increased Cul1 activity (Wu et al., 2011). In the wing disc, cells mutant for *CSN1b* or other CSN subunits misexpressed EGFR target genes. We found that the CSN restricts EGFR target gene expression by protecting Cic from ubiquitylation and proteasomal degradation. Although Cic degradation in *CSN4* or *CSN5* mutant cells requires its interaction with MAPK, *CSN1b* also protects Cic from another mechanism of degradation that is independent of MAPK, thus controlling its level of expression in the absence of RTK signaling. These results provide evidence for functional heterogeneity among the CSN subunits.

## RESULTS

### *CSN1b* mutations affect eye and wing development

In a genetic mosaic screen for genes required for normal photoreceptor differentiation (Janody et al., 2004), we recovered two non-complementing lethal alleles, *T12* and *T942*, that had the same mutant phenotype. Clones of cells homozygous for either mutation disrupted normal eye patterning and did not survive in the adult eye. In

the third larval instar eye imaginal disc, homozygous mutant clones showed reduced levels of the pan-neuronal marker Elav, which labels photoreceptors forming posterior to the morphogenetic furrow (Fig. 1B,C). Genetic mapping followed by sequencing of candidate genes in the mapped region identified likely null mutations in the *CSN1b* gene for both alleles. *T12* had a 122 bp deletion after V64, leading to a frameshift and early stop codon, whereas *T942* had a nonsense mutation at K366 (Fig. 1A). *CSN1b* encodes a subunit of the COP9 signalosome (CSN), a complex that removes the ubiquitin-like peptide Nedd8 from Cullins, which can form functional ubiquitin ligase complexes only when neddylated (Cope and Deshaies, 2003; Lyapina et al., 2001; Wei and Deng, 2003).

Several conserved signaling pathways were affected in *CSN1b* mutant clones. A reporter for *decapentaplegic* (*dpp*) expression, *dpp-lacZ*, was lost from the morphogenetic furrow in the eye disc, indicating a likely defect in Hh signaling (Fig. 1B). Expression of *dpp-lacZ* at the anterior-posterior compartment boundary of the wing disc was also greatly diminished, although *patched* (*ptc*), a target gene that requires high levels of Hh signaling, was still expressed (Fig. 1D). Other CSN subunits were previously reported to have similar effects on the expression of *dpp* in the wing disc and of Elav in the eye disc (Suh et al., 2002; Wu et al., 2011), supporting the conclusion that the *CSN1b* phenotype is attributable to a loss of CSN function. *CSN1b* may also affect the Wg signaling pathway in the wing disc. Expression of *Distalless-lacZ* (*Dll-lacZ*), a target gene reporter activated by low levels of Wg signaling, was reduced in *CSN1b* mutant clones in wing discs despite increased levels of the ligand Wg at the wing margin, where it is regulated by Notch signaling, a pathway known to be affected by CSN subunits (Mummery-Widmer et al., 2009) (Fig. 1E,F).

The effect of loss of CSN function on Hh signaling was attributed to increased neddylation of the Cul1-Slimb ubiquitin ligase, which enhances its ability to cleave the transcription factor Cubitus interruptus (Ci) and convert it from an activator of *dpp* expression

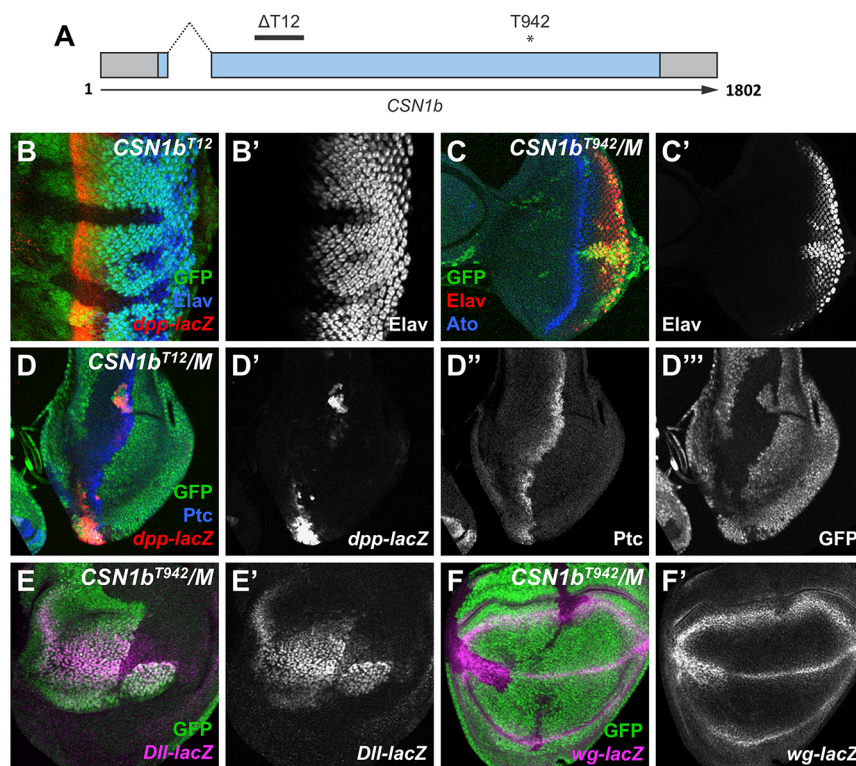

**Fig. 1. *CSN1b* mutations affect multiple signaling pathways.** (A) Diagram of the *CSN1b* gene, indicating the positions of the intron, the T12 deletion and the T942 nonsense mutation. (B-F) Third instar eye discs (B,C) and third instar wing discs (D-F) containing *CSN1b<sup>T12</sup>* (B,D) or *CSN1b<sup>T942</sup>* (C,E,F) clones marked by the absence of GFP (D'', green in B-F) on a wild-type (B) or *Minute* (C-F) background. Anterior is to the left and dorsal up in this and all subsequent figures. (B) Staining is with anti-Elav (B', blue in B) and anti- $\beta$ -galactosidase reflecting *dpp-lacZ* (red in B). (C) Staining is with anti-Elav (C', red in C) and anti-Ato (blue in C). In *CSN1b* clones, Elav expression is reduced and delayed, *dpp-lacZ* is strongly reduced, but Ato is unaffected. (D) Staining is with anti- $\beta$ -galactosidase reflecting *dpp-lacZ* (D', red in D) and anti-Ptc (D'', blue in D). (E) Staining is with anti- $\beta$ -galactosidase reflecting *Dll-lacZ* (E', magenta in E). (F) Staining is with anti- $\beta$ -galactosidase reflecting *wg-lacZ* (F', magenta in F). *dpp-lacZ* and *Dll-lacZ* are strongly reduced, *wg-lacZ* at the wing margin is expanded (although expression at the wing hinge, which is Notch-independent, is unaffected) and Ptc is unaffected in *CSN1b* clones. This is consistent with a requirement for CSN1b to activate low-threshold targets of Hh and Wg signaling and to inhibit Notch signaling.  $n \geq 10$  discs for all stainings shown in this and subsequent figures.

into a repressor (Wu et al., 2011). Enhanced ubiquitylation of the Wg pathway transcription factor  $\beta$ -catenin/Armado (Arm) by the Cull1-Slimb complex, leading to its degradation (Jiang and Struhl, 1998), could likewise explain the reduced expression of *Dll* in *CSN1b* mutant clones. These results suggest that *in vivo*, deneddylation by the CSN reduces the activity of CRL complexes.

### The COP9 signalosome restricts the expression of EGFR target genes

EGFR signaling is crucial for *Drosophila* wing vein development. In the late third instar larval wing imaginal disc, the EGFR pathway activates target genes such as *argos* (*aos*) and *kekkon* (*kek*) in cells that will differentiate into wing veins, forming a stereotypical striped pattern (Roch et al., 2002) (Fig. 2A). In *CSN1b* clones, we observed ectopic expression of *aos-lacZ*, a phenotype that had not previously been described for CSN subunits (Fig. 2B,C). This ectopic *aos* expression was not simply attributable to the presence of two copies of the *aos-lacZ* transgene within the mutant clone, as clones homozygous for *aos-lacZ* expressed *aos* only within its normal domain (Fig. S1A). To determine whether *aos* misregulation in *CSN1b* clones was attributable to the loss of CSN function, we examined *aos-lacZ* expression in clones mutant for other CSN subunits. Cells mutant for either *CSN4* or *CSN5*, the catalytic subunit, also showed ectopic expression of *aos-lacZ* (Fig. 2D,E) and *kek-lacZ* (Fig. S1B). Accordingly, adult wings containing clones mutant for any of the three subunits developed extra wing veins (Fig. 2G-J; Fig. S1D). Cultured S2 cells stably expressing EGFR (D2F cells) produce Aos in response to treatment with the ligand Spitz (Spi) (Schweitzer et al., 1995). Knocking down *CSN1b* or *CSN5* by RNA interference (RNAi) in these cells increased both basal and Spi-induced Aos levels (Fig. 2K) and transcription of the EGFR target gene *pnt-P1* (Fig. S1C), confirming a requirement for CSN subunits to restrict EGFR target gene expression in several contexts.

### The COP9 signalosome promotes Capicua accumulation

Upon binding of the ligand Spi to the EGFR, the GTP-bound form of Ras activates the protein kinase Raf, initiating a phosphorylation cascade. This cascade culminates with the phosphorylation of MAPK, which can then translocate into the nucleus and phosphorylate specific transcription factors to regulate target gene expression (see Fig. 6C) (McKay and Morrison, 2007). To determine the level at which EGFR signaling is affected by loss of CSN function, we examined MAPK phosphorylation using a phospho-specific antibody. No ectopic phospho-MAPK was detected in *CSN1b* or *CSN4* clones (Fig. S2A,B). Additionally, knocking down *CSN1b* or *CSN5* in D2F cells using double stranded RNA (dsRNA) did not increase MAPK phosphorylation (Fig. S2C). The increase in target gene expression despite unchanged MAPK phosphorylation suggests that COP9 exerts its effects on one or more transcription factors downstream of MAPK.

Phosphorylation by MAPK can change the stability or activity of transcription factors. In the wing disc, MAPK promotes *aos* expression by binding to and phosphorylating the transcriptional repressor Cic, inhibiting its function and triggering its degradation (Fig. 3A) (Astigarraga et al., 2007; Futran et al., 2015; Roch et al., 2002). This makes Cic a good candidate to mediate the effect of the CSN on EGFR signaling. Indeed, we found that Cic protein levels were reduced in *CSN1b*, *CSN4* and *CSN5* clones, in regions of the wing pouch in which the EGFR pathway is not strongly active (Fig. 3B-D). Quantification of Cic levels in the mutant clones relative to adjacent wild-type tissue showed that Cic staining was

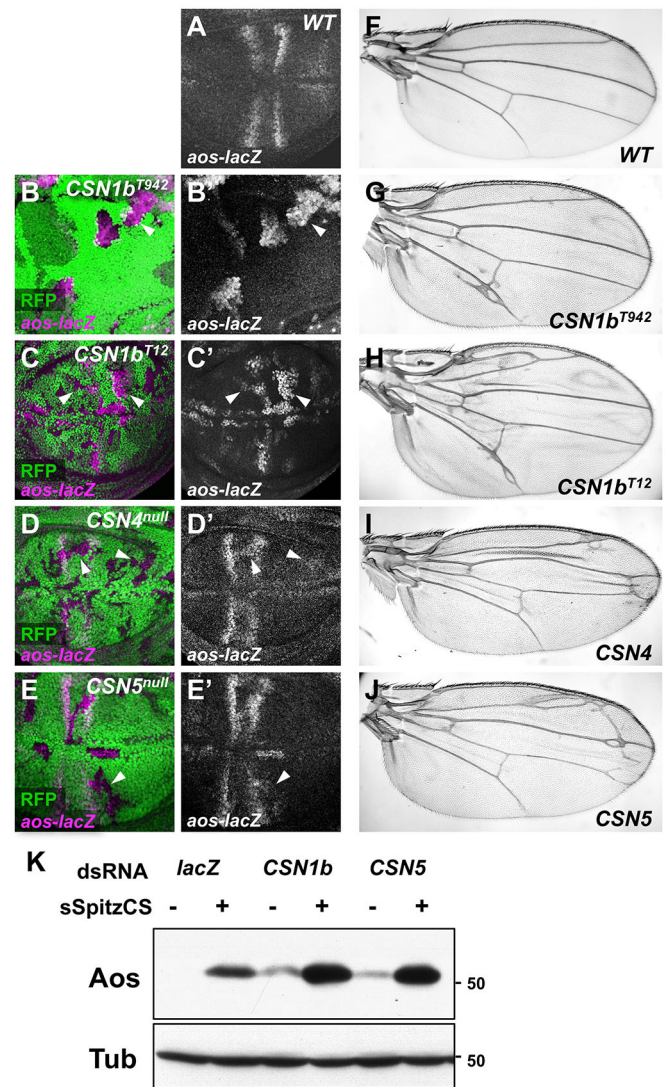

**Fig. 2. CSN subunits are required for EGFR signaling.** (A-E) Wing discs stained with anti- $\beta$ -galactosidase reflecting *aos-lacZ* (A, B'-E', magenta in B-E). (A) Wild type (WT). (B-E) Clones homozygous for *CSN1b*<sup>T942</sup> (B), *CSN1b*<sup>T12</sup> (C), *CSN4*<sup>null</sup> (D) or *CSN5*<sup>null</sup> (E) are marked by the absence of RFP (green in B-E). *aos* is misexpressed in clones mutant for all three CSN subunits. Note that the *aos-lacZ* transgene is on the same chromosome arm as *CSN1b*, and is therefore not present in the wild-type twin spots in (B,C). Arrowheads indicate representative clones. (F-J) Adult wings that are wild type (F) or contain clones mutant for *CSN1b*<sup>T942</sup> (G), *CSN1b*<sup>T12</sup> (H), *CSN4*<sup>null</sup> (I) or *CSN5*<sup>null</sup> (J). Loss of CSN subunits results in extra wing veins. (K) Lysates of D2F cells treated (+) or not treated (-) with a purified soluble form of the EGFR ligand Spitz (Miura et al., 2006) and with dsRNA targeting *lacZ*, *CSN1b* or *CSN5* as indicated, blotted with antibodies to Aos and  $\beta$ -tubulin. Knocking down CSN subunits increases both basal and Spitz-induced Aos levels.  $n \geq 3$  for all western blots shown in this and subsequent figures.

reduced by ~20% in CSN-depleted cells (Fig. 3H). However, measuring Cic levels in heterozygous *cic*<sup>+/+</sup> tissue, in which the level of background staining observed in homozygous *cic* mutant clones could be subtracted, revealed that the reduction in CSN clones is likely to be closer to 50% (Fig. S3). We examined whether this reduction had functional consequences. The *CUASC-lacZ* reporter for Cic repression, in which four Cic binding sites are introduced into *UAS-lacZ* (Ajuria et al., 2011), is expressed only in prospective veins when driven throughout the wing pouch in a wild-type background (Fig. 3E), but showed increased expression in cells

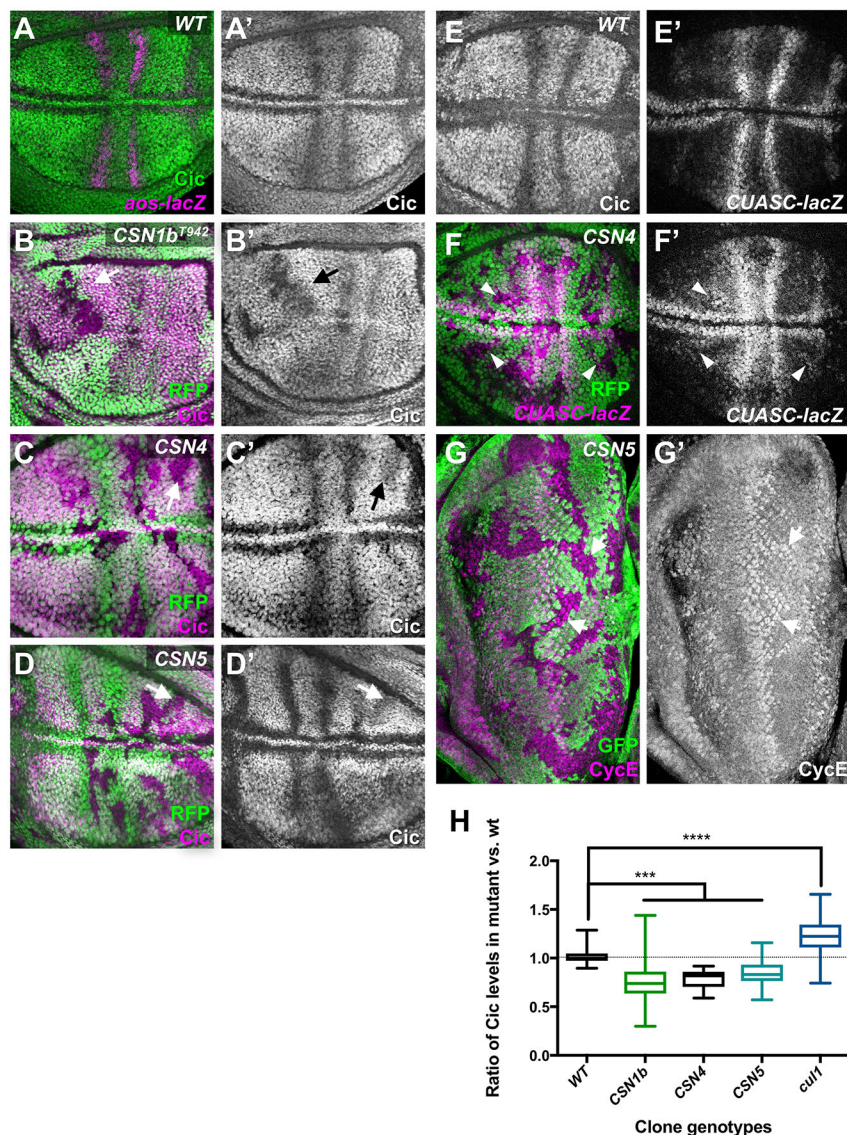

**Fig. 3. CSN subunits stabilize Cic.** (A-G) Wing discs (A-F) and an eye disc (G) that are wild type (A,E) or contain clones mutant for *CSN1b*<sup>T942</sup> (B), *CSN4*<sup>null</sup> (C,F) or *CSN5*<sup>null</sup> (D,G), marked by the absence of RFP (green in B-D,F) or GFP (green in G). Discs are stained with antibodies to Cic (A'-D',E, green in A, magenta in B-D),  $\beta$ -galactosidase reflecting *aos-lacZ* (magenta in A) or *CUASC-lacZ* driven by *C5-GAL4* (E',F', magenta in F) or *CycE* (G', magenta in G). Cic levels are reduced, whereas *CUASC-lacZ* and *CycE*, targets of Cic repression, are increased in the absence of CSN subunits. Representative clones are marked by arrows. (H) Quantification of Cic levels in wild-type, *CSN1b*, *CSN4*, *CSN5* or *Cul1* clones compared with adjacent wild-type tissue. Box and whiskers plot shows median bounded by minimum, first quartile, third quartile and maximum. WT,  $n=27$  clones in nine wing discs; *CSN1b*,  $n=73$  clones in eight discs; *CSN4*,  $n=29$  clones in 14 discs; *CSN5*,  $n=43$  clones in 15 discs; *cul1*,  $n=78$  clones in 15 discs; \*\*\* $P<0.005$  and \*\*\*\* $P<0.0001$  by one-way ANOVA.

mutant for *CSN4* (Fig. 3F). Cic has also been shown to regulate EGFR-mediated growth in the eye disc by repressing *cyclin E* (*cycE*) expression (Tseng et al., 2007). *CSN5* clones had higher levels of *CycE* than wild-type tissue, suggesting that the CSN regulates Cic levels in this tissue also (Fig. 3G). Notably, *CycE* protein is a target of Cull1 degradation (Ou et al., 2002), so its increased transcription must be robust enough to counteract the reduction in protein stability caused by increased Cull1 activity in *CSN5* clones. By contrast, the CSN was not essential for EGFR-induced photoreceptor differentiation (Fig. 1B,C), which is mediated by activation of the Pnt-P2 transcription factor rather than relief of Cic repression (Yang and Baker, 2003). Overall, these results suggest that the CSN promotes Cic stabilization.

#### Cul1-mediated ubiquitylation of Cic targets it for proteasomal degradation

The Cic protein is known to be destabilized by receptor tyrosine kinase signaling in the wing disc and embryo (Grimm et al., 2012; Roch et al., 2002), but the mechanism of its degradation has not been determined. Cullins, the scaffold subunits of CRLs, are substrates for deneddylation by the CSN. We therefore hypothesized that upon phosphorylation by MAPK, Cic is

ubiquitinated by a CRL and targeted for proteasomal degradation. To test this, we determined whether Cic could be stabilized by blocking the proteasome or Cullins. In S2 cells, knocking down *CSN1b* using dsRNA reduced the levels of transfected HA-Cic driven from a UAS promoter, and Cic levels were restored by the proteasome inhibitor MG132 (Fig. 4A) (Lee and Goldberg, 1998). This indicates that loss of CSN induces Cic degradation in a proteasome-dependent manner. In the presence of MG132, an HA-tagged form of Cic could be co-immunoprecipitated with Myc-tagged ubiquitin (Fig. 4B), suggesting that ubiquitylation targets Cic for proteasomal degradation. *In vivo*, wing discs treated with MLN4924, which inhibits the Nedd8 activating enzyme and thus prevents neddylation of all Cullins (Soucy et al., 2009), or with Suramin, which inhibits CRLs by preventing their interactions with E2 ubiquitin conjugating enzymes (Wu et al., 2016), showed increased Cic levels in the regions where it is normally degraded in response to EGFR signaling (Fig. 4C,D; Fig. S4A).

Examination of mutations and RNAi lines targeting the six *Drosophila* Cullins identified Cull1 as the most likely regulator of Cic stability. *Cul1*<sup>EX</sup> clones in EGFR-responsive regions of the wing disc failed to degrade Cic (Fig. 3H; Fig. 4E; Fig. S4B), leading to loss of some wing veins in the adult (Fig. S4G). Consistent with

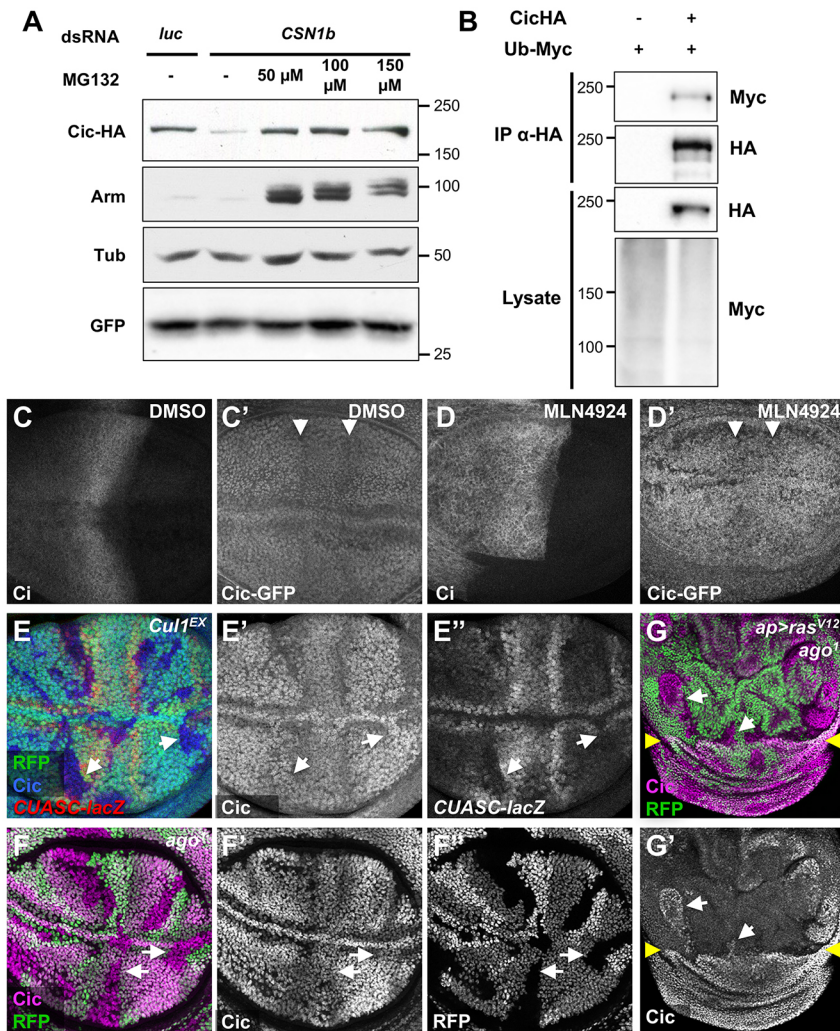

**Fig. 4. Cic is targeted for degradation by a Cul1-Ago ubiquitin ligase.** (A) Lysates from D2F cells co-transfected with *Actin-GAL4*, *UAS-HA-Cic*, *UAS-GFP* and dsRNA targeting *luciferase* or *CSN1b*, and treated with the indicated concentrations of MG132. Western blots with anti-HA, anti-Arm, anti- $\beta$ -tubulin and anti-GFP are shown. The proteasome inhibitor MG132 stabilizes Arm and restores Cic stability in the absence of *CSN1b*. (B) Lysates of cells treated with MG132 and transfected with ubiquitin-Myc, with or without Cic-HA, were immunoprecipitated using anti-HA beads. Lysates and immunoprecipitates are blotted for anti-HA and anti-Myc. Immunoprecipitated Cic is ubiquitinated in these conditions. (C,D) Wing discs expressing *cic-GFP* from the endogenous promoter and treated with DMSO (C) or 50  $\mu$ M MLN4924 in DMSO (D) and stained with anti-Ci (C,D) and anti-GFP (C',D'). The neddylation inhibitor MLN4924 stabilizes both Ci in the anterior and Cic in the wing vein primordia (arrowheads). (E) *Cul1<sup>EX</sup>* clones are marked by the absence of RFP (green) and stained for Cic (E', blue in E) and *CUASC-lacZ* driven by *C5-GAL4* (E'', red in E). (F) *ago<sup>1</sup>* clones are marked by the absence of RFP (F'', green in F) and stained for Cic (F', magenta in F). Arrows indicate representative clones. (G) *ago<sup>1</sup>* clones are marked by the absence of RFP (green) in a disc in which *Ras<sup>V12</sup>* is expressed in the dorsal domain (above the yellow arrowheads), causing destabilization of Cic (G', magenta in G) except within the *ago* clones. White arrows indicate clones in which Cic is stabilized.

this, cells lacking SKP1-related A (SkpA), the subunit that links Cul1 to substrate-binding F-box proteins (Bocca et al., 2001), also showed accumulation of Cic (Fig. S4C). To identify the F-box subunit that binds Cic, we screened RNAi lines by expressing them in the dorsal domain of the wing disc under the control of *apterous* (*ap*)-GAL4. Only *archipelago* (*ago*) (Moberg et al., 2001) RNAi increased Cic-GFP levels in the wing vein primordia (Fig. S4D-F). *ago<sup>1</sup>* mutant clones in EGFR-responsive regions also failed to degrade Cic (Fig. 4F). When Cic phosphorylation and degradation was induced throughout the dorsal wing disc by expressing activated Ras with *ap*-GAL4, *ago* mutant clones still accumulated Cic (Fig. 4G). Ago/Fbw7 recognizes the phosphodegron pTPPXS (Welcker and Clurman, 2008), a sequence that is present at position 910-914 of the Cic-PA isoform. Together, these data indicate that the SCF<sup>Ago</sup> complex is responsible for ubiquitinating Cic and targeting it for proteasomal degradation.

#### CSN1b protects Cic from a MAPK-independent mechanism of degradation

If the ubiquitylation and proteasomal degradation of Cic in the absence of CSN are triggered by MAPK-mediated phosphorylation, they should require EGFR signaling. Indeed, the reduction in Cic protein and ectopic expression of *aos* are most consistent in the central region of the wing disc between the two endogenous *aos* stripes, where EGFR pathway activity is likely to be highest. We

took two approaches to block both EGFR signaling and CSN activity. First, we found that the ectopic induction of *aos-lacZ* caused by *CSN6* RNAi expression in the dorsal wing disc (Fig. 5A,B) was completely blocked by coexpression of *mapk* RNAi (Fig. 5C, D). Our second epistasis experiment used mutations in *Ras85D*, an essential EGFR pathway component (Diaz-Benjumea and Hafén, 1994). Like single *Ras85D* mutant clones (Fig. 5F) but opposite to single *CSN5* mutant clones (Fig. 5E), *Ras85D CSN5* double mutant clones showed decreased *aos-lacZ* expression and strong Cic accumulation (Fig. 5G). These results indicate that reduced Cic stability and ectopic *aos* expression in the absence of CSN function require input from the EGFR signaling pathway. Of note, Cic levels increased in *Ras85D* and *Ras85D CSN5* double mutant clones even outside the prospective vein stripes, indicating that low level EGFR signaling throughout the wing pouch reduces Cic levels sufficiently to allow cell growth. These low levels of EGFR activity make Cic stability dependent on the CSN.

The requirement for EGFR pathway activity upstream of *aos* expression in cells lacking *CSN4* or *CSN5* function could indicate that only Cic that has been phosphorylated by MAPK requires the CSN for its stability. To test this, we used a form of Cic that lacks the C2 domain necessary for interaction with MAPK (Andreu et al., 2012; Astigarraga et al., 2007). Cic<sup>AC2</sup> fully blocked both endogenous *aos* expression and ectopic *aos* expression within *CSN5* mutant clones, and its stability was unaffected by loss of

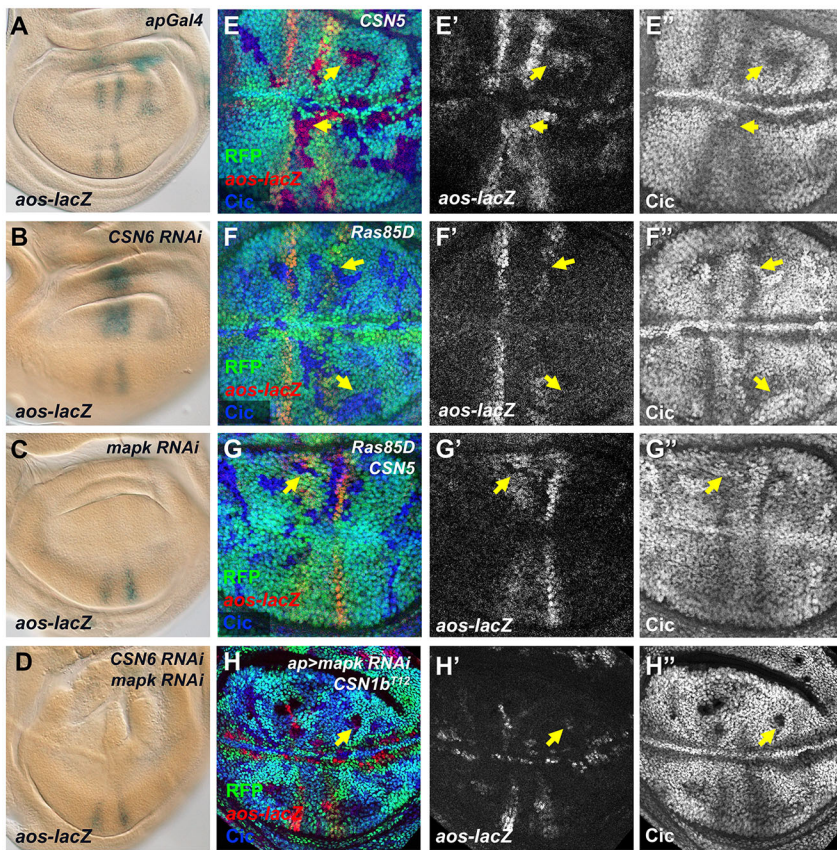

**Fig. 5. EGFR signaling is required for Cic degradation in the absence of CSN subunits other than CSN1b.** (A-D) Wing discs in which *aos-lacZ* is stained with X-gal. *ap-GAL4* drives no RNAi construct (A), *CSN6* RNAi (B), *mapk* RNAi (C) or *CSN6* RNAi and *mapk* RNAi (D). Increased *aos* expression in the absence of *CSN6* requires MAPK. (E-G) Wing discs with clones mutant for *CSN5* (E), *Ras85D* (F) or *CSN5* and *Ras85D* (G), marked by the absence of RFP (green). Anti- $\beta$ -galactosidase reflecting *aos-lacZ* (E', F', G', red in E-G) and anti-Cic (E'', F'', G'', blue in E-G) are shown. Yellow arrows point to representative clones. Double mutant clones show reduced *aos-lacZ* and increased Cic, like *Ras85D* clones and opposite to *CSN5* clones. (H) Wing disc with *CSN1b<sup>T12</sup> Dronc<sup>29</sup>* clones marked by the absence of RFP (green), expressing *mapk* RNAi in the dorsal compartment under the control of *ap-GAL4*, stained for anti- $\beta$ -galactosidase reflecting *aos-lacZ* (H', red in H) and Cic (H'', blue in H). *mapk* RNAi blocks *aos-lacZ* expression and Cic degradation in wild-type cells, but not in *CSN1b* clones (arrow).

*CSN5* (Fig. 6A). Preventing phosphorylation of Cic by MAPK thus renders it independent of the deneddylation function of the CSN. By contrast, in *CSN1b* clones Cic<sup>ΔC2</sup> was degraded and did not prevent misexpression of *aos* (Fig. 6B; Fig. S5A,B). Consistent with this result, endogenous Cic could be degraded and *aos* expressed in *CSN1b* clones even when EGFR-induced Cic degradation was blocked by *mapk* RNAi (Fig. 5H). Both experiments suggest that *CSN1b* has a function separate from *CSN5* that allows it to protect Cic from a MAPK-independent mechanism of degradation. We found that Cic<sup>ΔC2</sup> was also ubiquitinated in S2 cells, providing additional evidence for MAPK-independent degradation of Cic (Fig. S5C). In addition, Myc-tagged *CSN1b* co-immunoprecipitated with both Cic and Cic<sup>ΔC2</sup> (Fig. S5D), suggesting that direct binding could contribute to its ability to protect Cic from degradation.

## DISCUSSION

Our analysis of the *CSN1b* subunit of the COP9 signalosome has uncovered both a new function for the entire complex, in regulating EGFR signaling through Cullin-mediated control of Cic stability, and an independent protective effect of *CSN1b* that sets the level of the Cic repressor in the absence of a signal. These findings emphasize the complex effects of the CSN as a modulator of protein degradation.

### Regulation of Capicua degradation

MAPK phosphorylation of Cic has been shown to relocalize it to the cytoplasm, and in the wing disc and embryo, this results in its degradation (Astigarraga et al., 2007; Dissanayake et al., 2011; Grimm et al., 2012). CIC degradation has been assigned a crucial role in the metastasis of lung and gastric adenocarcinomas (Okimoto

et al., 2016). However, the mechanism by which Cic is targeted for degradation was previously unknown. Our data showing that Cull1, SkpA and the F-box protein Ago negatively regulate Cic levels, and that inhibition of CRLs or the proteasome stabilizes Cic, argue that MAPK phosphorylation targets Cic for ubiquitylation by the SCF<sup>Ago</sup> complex and subsequent proteasomal degradation (Fig. 6C). The ubiquitin modification itself may be sufficient to block Cic activity even before its degradation; the moderate reduction in Cic protein we observed in *CSN* mutant cells is similar to the reduction in *cic* heterozygous cells, which is not sufficient for ectopic *aos* expression (Fores et al., 2015). These findings suggest that drugs that target CRLs, such as MLN4924 or suramin, might be useful in treating cancers for which CIC is a suppressor of growth or metastasis (Bettegowda et al., 2011; Choi et al., 2015; Dissanayake et al., 2011; Nawrocki et al., 2012; Okimoto et al., 2016; Wu et al., 2016). Conversely, drugs that antagonize the CSN might help reduce the accumulation of toxic Cic-Ataxin complexes in spinocerebellar ataxia (Lam et al., 2006; Lasagna-Reeves et al., 2015).

Our data extend previous observations reporting distinct modes of Cic regulation. In ovarian follicle cells, EGFR activation leads to cytoplasmic localization of phosphorylated Cic, but not to its degradation (Astigarraga et al., 2007). We found that the subcellular distribution of Cic and expression of its target genes were unaffected in *CSN1b* or *CSN5* mutant follicle cells (data not shown), suggesting that Cic is not ubiquitinated, and therefore does not require CSN function, in this tissue. Conversely, our data show that Cic stability can be regulated independently of MAPK and of the C2 domain that is required for MAPK binding (Astigarraga et al., 2007; Futran et al., 2015), through a mechanism that is specifically antagonized by *CSN1b*. The competition between *CSN1b* and this

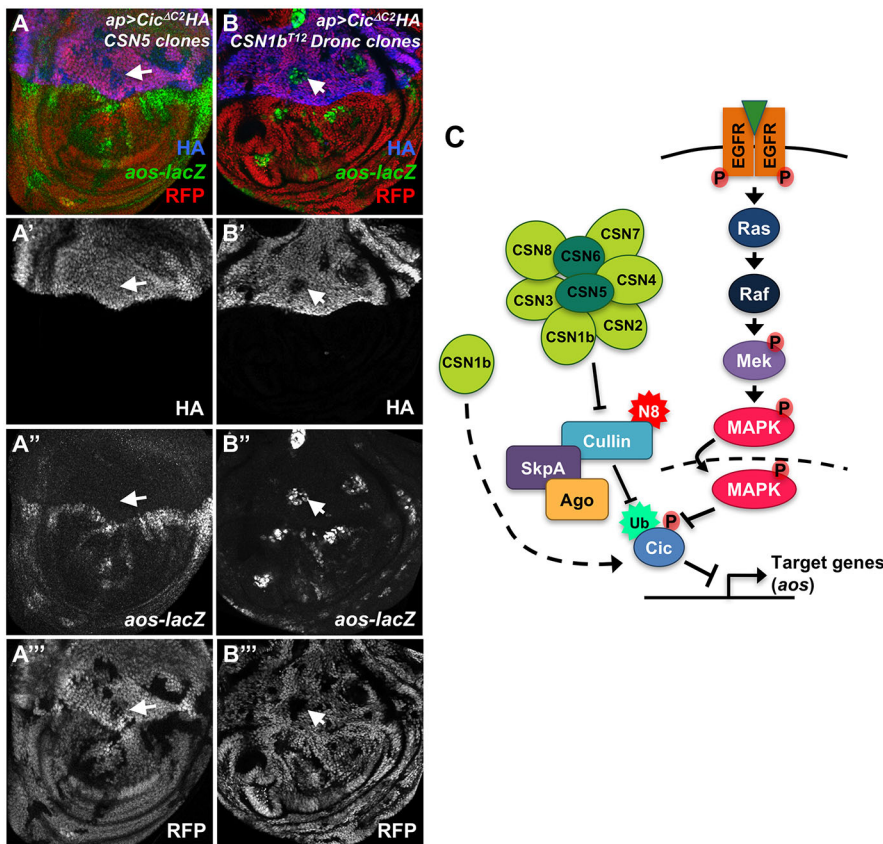

**Fig. 6. CSN subunits protect Cic from EGFR-dependent and -independent modes of degradation.** (A, B) Wing discs expressing UAS-Cic<sup>ΔC2</sup>-HA (HA stained in A', B', blue in A, B) in the dorsal domain using ap-GAL4, with clones mutant for CSN5 (A) or CSN1b<sup>T12</sup> Dronc<sup>29</sup> (B) marked by the absence of RFP (A'', B'', red in A, B). Anti-β-galactosidase staining reflects aos-lacZ (A'', B'', green in A, B). Cic<sup>ΔC2</sup> is stable throughout the dorsal domain and can repress aos-lacZ in CSN5 clones, but is degraded and fails to repress aos-lacZ in CSN1b clones. Arrows point to representative clones. (C) Diagram showing a model for the effects of CSN subunits on Cic. The CSN promotes Cic stabilization by deneddylating Cul1 and reducing the ability of a Cul1-SkpA-Ago complex to ubiquitinate Cic. CSN1b also protects Cic from a MAPK-independent mode of degradation.

alternative mode of degradation would establish the basal level of Cic in the absence of RTK activity. The other highly conserved and essential domains of Cic, the high-mobility group (HMG)-box DNA-binding domain and the C1 motif (Astigarraga et al., 2007), might influence its stability in unstimulated cells. The kinase Minibrain (Mnb) was recently found to phosphorylate Cic on its N-terminus, inhibiting its repressive activity (Yang et al., 2016). Mnb and its adaptor Wings apart do not affect Cic stability, but this finding hints that other mechanisms for Cic regulation may remain to be discovered.

#### Deneydylase-independent functions for CSN1b

Our analysis confirms that CSN1b, which had not previously been studied *in vivo*, shares functions with CSN4, CSN5 and CSN8 in eye development (Cope et al., 2002; Suh et al., 2002), Hedgehog signaling (Wu et al., 2011) and Notch signaling (Mummery-Widmer et al., 2009). However, we find that CSN1b differs from other CSN subunits in its requirement to stabilize unphosphorylated Cic. CSN1b mutant clones are also smaller and rounder in shape than CSN4 or CSN5 clones (Figs 2, 3, 6), and are difficult to recover without inhibiting cell death by removing *Dronc*, suggesting that this subunit may have additional CSN-independent functions. Various CSN subcomplexes and free subunits have been proposed to function independently of the CSN (Dubiel et al., 2015); for instance, CSN2 and CSN7 can act as transcriptional regulators (Dressel et al., 1999; Singer et al., 2014). Flies mutant for CSN4, CSN5 and CSN8 show different phenotypes *in vivo*, although this could reflect differential stability of their maternally provided gene products (Oren-Giladi et al., 2008; Oron et al., 2002, 2007). The CSN5 subunit contains the active site for deneddylation and is the last to assemble into the CSN (Lingaraju et al., 2014). Although

the other subunits are thought to have primarily structural roles, CSN1, CSN2 and CSN4 also form contacts with subunits and substrates of CRLs (Lee et al., 2013; Lingaraju et al., 2014). During *Drosophila* oogenesis, Bag of marbles has been reported to bind to and sequester CSN4, altering the function of the CSN (Pan et al., 2014).

A mass spectrometry study in S2R+ cells did not detect CSN1b in a complex with the other CSN subunits (Guruharsha et al., 2011), although this result is difficult to reconcile with the central position of CSN1 in the human and fungal signalosomes (Beckmann et al., 2015; Lingaraju et al., 2014). The C-terminal Proteasome-COP9 complex-Initiation factor 3 (PCI) domain of CSN1 is sufficient for its incorporation into the CSN, whereas the N-terminal domain has been assigned other functions (Wang et al., 2002), including transcriptional repression (Tsuge et al., 2001), regulation of JNK activity (Li et al., 2007; Tsuge et al., 2011) and interactions with the calcium-binding protein TSA1 (Li et al., 2011) and inositol 1,3,4-trisphosphate 5/6-kinase (Sun et al., 2002). The C-terminal tail of human CSN1 also directly interacts with IκB (Lee et al., 2013). We likewise detected a physical interaction between CSN1b and Cic, consistent with a previous mass spectrometry study (Yang et al., 2016), suggesting that direct binding may underlie the effect of CSN1b on Cic stability. Interestingly, *Drosophila* has a second CSN1 subunit, CSN1a, which lacks the PCI domain and is primarily expressed in the testis (Flybase), and human CSN1 has multiple alternatively spliced isoforms and can be phosphorylated (Fang et al., 2008; Fuzesi-Levi et al., 2014). Differently spliced or modified forms of CSN1 could influence CSN deneddylation activity or mediate functions of CSN1 independent of the rest of the complex. Our CSN1b mutations will be useful tools for further analysis of the relationship of this subunit to the COP9 signalosome.

## MATERIALS AND METHODS

### *Drosophila* genetics

The T12 and T942 mutations were identified in the screen described by Janody et al. (2004). The lethality of the two mutations was mapped by recombination with  $P(w^+)$  elements, using the FRT80 site on the chromosome as an additional marker, and was localized 0.06 cM distal to  $P\{EPgy2\}CG18135^{EY07333}$ . Homozygous *CSN1b* clones were generated by crossing *CSN1b*, *FRT80/TM6B* or *aos-lacZ*, *CSN1b*, *FRT80/TM6B* or *Dronc<sup>129</sup>*, *aos-lacZ*, *CSN1b*, *FRT80/TM6B* or *UAS-Cic<sup>AC2</sup>HA*; *Dronc<sup>129</sup>*, *aos-lacZ*, *CSN1b*, *FRT80/SM6-TM6B* or *UAS-mapk RNAi*; *Dronc<sup>129</sup>*, *aos-lacZ*, *CSN1b*, *FRT80/SM6-TM6B* males to *ey-FLP*; *Ubi-GFP*, *FRT80* or *ey-FLP*; *M(3)67C*, *Ubi-GFP*, *FRT80* or *hs-FLP*; *M(3)67C*, *Ubi-GFP*, *FRT80/TM6B* or *Ubx-FLP*; *His2AvRFP*, *FRT80* or *tsh-GAL4*, *UAS-FLP*; *His2AvRFP*, *FRT80/SM6-TM6B* or *Ubx-FLP*; *ap-GAL4/CyO*; *His2AvRFP*, *FRT80/TM6c* females. *CSN4* clones were generated by crossing *FRT42*, *CSN4<sup>null</sup>*; *aos-lacZ/SM6-TM6B* males to *Ubx-FLP*; *FRT42*, *Ubi-RFPNLS* or *ey-FLP*; *FRT42*, *Ubi-RFPNLS* or *Ubx-FLP*; *FRT42*,  $P(y^+)$  females. *CSN5* clones were generated by crossing *aos-lacZ*, *FRT82*, *CSN5<sup>null</sup>/TM6B* or *aos-lacZ*, *FRT82*, *Ras85D<sup>AC40B</sup>*, *CSN5<sup>null</sup>/TM6B* or *UAS-Cic<sup>AC2</sup>HA*; *FRT82*, *CSN5<sup>null</sup>/TM6B* males to *Ubx-FLP*; *FRT82*, *Ubi-RFPNLS* or *Ubx-FLP*; *ap-GAL4/CyO*; *FRT82*, *Ubi-RFPNLS/TM6c* females. *Cul1* clones were generated by crossing *FRT42*, *Cul1<sup>EX</sup>*; *C5-GAL4*, *CUASC-lacZ/SM6-TM6B* males to *Ubx-FLP*; *FRT42*, *Ubi-RFPNLS* females. *ago* clones were generated by crossing *ago<sup>1</sup>*, *FRT80/TM6B* or *UAS-ras<sup>V12</sup>*; *ago<sup>1</sup>*, *FRT80/SM6-TM6B* males to *Ubx-FLP*; *His2AvRFP*, *FRT80* or *tsh-GAL4*, *UAS-FLP*; *His2AvRFP*, *FRT80/SM6-TM6B* or *Ubx-FLP*; *ap-GAL4/CyO*; *His2AvRFP*, *FRT80/TM6c* females. *SkpA* clones were generated by crossing *SkpA<sup>7D9</sup>*, *FRT19A/FM6*,  $P(Tb, RFP)$  females (Legent et al., 2012) to *hs-FLP*, *FRT19*, *Ubi-RFPNLS* males. *cic* clones were generated by crossing *FRT82*, *cic<sup>Q474X</sup>/TM6B* males to *hs-FLP*; *FRT82*, *Ubi-GFP* females and heat shocking for 1 h at 37°C in first and second instar. *aos-lacZ*, *dpp-lacZ*, *Dll-lacZ* and *wg-lacZ* reporters are described in Flybase. The F-box RNAi screen was performed by crossing *UAS-RNAi* males to *ap-GAL4*, *cic-GFP*; *UAS-dcr2/SM6-TM6B* females and examining Cic-GFP expression in third instar wing discs. *UAS-RNAi* lines were obtained from the Bloomington *Drosophila* Stock Center and the Vienna *Drosophila* Resource Center. Cic-GFP is a C-terminally GFP- and FLAG-tagged form of Cic expressed from its endogenous promoter, made by recombining a BAC transgene (<http://flybase.org/reports/FBfr0220060.html>).

### Immunohistochemistry and western blotting

Eye and wing discs were stained as described by Hazelett et al. (1998). Antibodies used were rat anti-Elav [1:100; Developmental Studies Hybridoma Bank (DSHB), 7E8A10], chicken anti-GFP (1:300; Aves, GFP-1020), mouse anti- $\beta$ -galactosidase (1:10; DSHB, 40-1a), rabbit anti-Ato (Jarman et al., 1995), mouse anti-Ptc (1:10; DSHB, Apa1), rat anti-Ci (Motzny and Holmgren, 1995), guinea pig anti-Cic (Tseng et al., 2007), mouse anti-CycE (1:1; Richardson et al., 1995), rat anti-HA (1:100; Roche, 3F4) and mouse anti-dpERK (1:100; Sigma, M8159; signal amplified using the TSA Cyanine 5 System from PerkinElmer). Fluorescent secondary antibodies were from Jackson ImmunoResearch (1:200; guinea pig Cy3, 706-165-148; rabbit Cy3, 711-165-152; mouse Cy3, 715-165-151; rat Cy3, 712-165-153; mouse Cy5, 715-175-151; guinea pig DyLight 649, 706-496-148; rat Cy5, 712-175-153; rabbit Cy5, 711-175-152) or Life Technologies (1:1000; mouse Alexa 488, A-21202; rabbit Alexa 488, A21206; chicken Alexa 488, A11039; rat Alexa 488, A-21208; guinea pig Alexa 488, A-11073), and images were obtained using a Leica SP5 confocal microscope. Quantification of Cic signal intensity was performed using ImageJ by measuring average signal intensity in RFP-negative clones outside the prospective wing veins, compared with adjacent RFP-positive regions of the same size. In discs containing *cic* mutant clones, the intensity in these homozygous clones was subtracted as background. To block CRLs, wing discs were dissected in PBS and incubated in Schneider's complete media supplemented with 50  $\mu$ M MLN4924 or 500  $\mu$ M Suramin for 5 h at room temperature, before fixing and staining. To make whole fly protein extracts, 20 individuals were lysed in 100  $\mu$ l RIPA buffer supplemented with EDTA-free cOmplete protease inhibitor (Roche), 5 mM NaF and 1 mM Na<sub>3</sub>VO<sub>4</sub>. The lysate was then cleared by centrifugation and an equal volume of 2×

Laemmli buffer was added. For western blots, the samples were boiled for 5 min at 95°C and loaded on 8% SDS-PAGE gels. The gels were transferred onto nitrocellulose membranes (Bio-Rad), which were blocked for 30 min in TBST [20 mM Tris (pH 7.6), 137 mM NaCl, 0.2% Tween-20] supplemented with 5% low-fat milk, before incubation with primary antibodies overnight at 4°C in TBST with 5% milk. Blots were washed with TBST for 30 min and incubated with horseradish peroxidase-conjugated secondary antibodies (1:10,000; Jackson ImmunoResearch; rabbit HRP, 711-035-152; rat HRP, 712-035-153; mouse HRP, 715-035-151; chicken HRP, 703-035-155) for 1 h in TBST plus 5% milk. Blots were developed with enhanced chemiluminescence (Thermo SuperSignal WestPico). Primary antibodies used were as follows: rat anti-HA (1:1000; Roche, 3F4), mouse anti-Arm (1:100; DSHB, N2 7A1), mouse anti- $\beta$ -tubulin (1:10,000; Sigma, T4026), mouse anti-Argos (1:50; DSHB; 85/2/16), chicken anti-GFP (1:10,000; Aves, GFP-1020), mouse anti-Myc (1:1000; Cell Signaling, 9B11), mouse anti-phospho-MAPK (1:1000; Sigma, M8159) and rabbit anti-MAPK (1:20,000; Sigma, M5670).

### Molecular biology

The pUAST-CicHA and pUAST-Cic<sup>AC2</sup>HA plasmids were a gift from Gerardo Jimenez (Astigarraga et al., 2007). pUAST-Ub-Myc was a gift from Hyung Don Ryoo (NYU School of Medicine, NY, USA). To make the Myc-*CSN1b* construct, the *CSN1b* coding region was amplified by PCR from wild-type adult genomic DNA using the following primers: 5'-TTGGGA-ATTCCAAAAGCAGAAGCTGATCTCCGAGGAGGACCTGATGCC- GTGCTGCCGAT-3' and 5'-ATCCTCTAGACTAGATTCGGGCGAGTT-GAGCAG-3'. The amplicon was cloned into pUASTattB as a *EcoRI-XbaI* fragment.

### Cell culture and immunoprecipitation

S2 cells and D2F cells were maintained in Schneider's medium supplemented with 10% fetal calf serum. D2F cells (Schweitzer et al., 1995) were provided by Erika Bach (NYU School of Medicine, NY, USA), and induction of EGFR by Cu<sub>2</sub>SO<sub>4</sub> treatment was confirmed by western blotting. These cells were additionally treated with 150  $\mu$ g/ml G418. dsRNAs were generated using the MEGAScript T7 and T3 kit (Ambion) as described by Worby et al. (2001). We chose dsRNA templates using the DRSC database ([www.flyrni.org](http://www.flyrni.org)) for the genes *CSN1b* (DRSC11108) and *CSN5* (DRSC22381) and amplified them from wild-type fly genomic DNA. For *luciferase* dsRNA, we used the primers FWD 5'-TCGTCACATCTC-ATCTACTCTCCC-3' and REV 5'-ATGGAACAACCTTTACCGACCGC-3' and amplified our dsRNA template from the TOP-Flash plasmid. Total RNA was extracted using Trizol (Invitrogen). RT-PCR was performed on 1  $\mu$ g of total RNA using the Invitrogen SuperScript First-Strand Kit. Primer sequences are available on request.

To look at endogenous protein and mRNA levels, 10<sup>6</sup> cells/well were treated with 15  $\mu$ g dsRNA. When assessing exogenous protein levels, 10<sup>6</sup> cells/well were transfected with 0.9  $\mu$ g total plasmid DNA and 0.9  $\mu$ g dsRNA using Effectene (Qiagen). Four days later, cells were harvested and lysed in ice-cold RIPA buffer supplemented with EDTA-free cOmplete protease inhibitor (Roche), 5 mM NaF and 1 mM Na<sub>3</sub>VO<sub>4</sub>. Laemmli buffer was added. To activate the EGFR pathway, EGFR production was induced on the previous day for 3 h with 60  $\mu$ M CuSO<sub>4</sub> before adding purified sSpiCS to the medium overnight at a concentration empirically determined to induce Aos expression (Miura et al., 2006).

For immunoprecipitation, the transfection was scaled up to 6 cm plates, and cells were harvested and lysed in ice-cold lysis buffer [75 mM NaCl, 50 mM Tris-HCl pH 7.5, 1 mM EDTA, 0.2% NP-40, 5 mM NaF, 1 mM Na<sub>3</sub>VO<sub>4</sub>, EDTA-free cOmplete protease inhibitor (Roche)]. Lysates were incubated for 1 h with anti-HA affinity matrix (Roche 3F10). Washes were performed using 75 mM NaCl, 10 mM Tris-HCl pH 7.5, 1 mM EDTA, 5 mM NaF, 1 mM Na<sub>3</sub>VO<sub>4</sub>, EDTA-free cOmplete protease inhibitor (Roche) and precipitates were eluted with 2× Laemmli buffer.

### Acknowledgements

We thank Erika Bach, Daniel Chamovitz, Cheng-Ting Chien, Iswar Hariharan, Andrew Jarman, Gerardo Jimenez, Qiuling Li, Ken Moberg, Hyung Don Ryoo, the Bloomington *Drosophila* Stock Center, the Vienna *Drosophila* Resource Center



and the Developmental Studies Hybridoma Bank for fly stocks and reagents. We are grateful to Hui Hua Liu, Juhee Pae and Tony Huang for technical assistance and advice. The manuscript was improved by the critical comments of Jessica Douthit, Cheuk Hei Ho, Carolyn Morrison, Nicholas Stavropoulos and Josefa Steinhauer.

#### Competing interests

The authors declare no competing or financial interests.

#### Author contributions

Conceptualization: A.S., K.L., J.E.T.; Validation: A.S., D.H., J.E.T.; Investigation: A.S., D.H., K.L., J.E.T.; Writing - original draft: A.S., J.E.T.; Writing - review & editing: D.H., K.L.; Visualization: A.S., J.E.T.; Supervision: J.E.T.; Project administration: J.E.T.; Funding acquisition: J.E.T.

#### Funding

This work was supported by the National Institutes of Health (EY13777 to J.E.T.). Deposited in PMC for release after 12 months.

#### Supplementary information

Supplementary information available online at <http://dev.biologists.org/lookup/doi/10.1242/dev.148767.supplemental>

#### References

- Ajuria, L., Nieva, C., Winkler, C., Kuo, D., Samper, N., Andreu, M. J., Helman, A., Gonzalez-Crespo, S., Paroush, Z., Courey, A. J. et al. (2011). Capicua DNA-binding sites are general response elements for RTK signaling in *Drosophila*. *Development* **138**, 915-924.
- Andreu, M. J., Ajuria, L., Samper, N., Gonzalez-Perez, E., Campuzano, S., Gonzalez-Crespo, S. and Jimenez, G. (2012). EGFR-dependent downregulation of Capicua and the establishment of *Drosophila* dorsoventral polarity. *Fly* **6**, 234-239.
- Appert-Collin, A., Hubert, P., Cremel, G. and Bennisroune, A. (2015). Role of ErbB receptors in cancer cell migration and invasion. *Front. Pharmacol.* **6**, 283.
- Astigarraga, S., Grossman, R., Diaz-Delfin, J., Caelles, C., Paroush, Z. and Jimenez, G. (2007). A MAPK docking site is critical for downregulation of Capicua by Torso and EGFR RTK signaling. *EMBO J.* **26**, 668-677.
- Beckmann, E. A., Kohler, A. M., Meister, C., Christmann, M., Draht, O. W., Rakebrandt, N., Valerius, O. and Braus, G. H. (2015). Integration of the catalytic subunit activates deneddylase activity in vivo as final step in fungal COP9 signalosome assembly. *Mol. Microbiol.* **97**, 110-124.
- Bettgowda, C., Agrawal, N., Jiao, Y., Sausen, M., Wood, L. D., Hruban, R. H., Rodriguez, F. J., Cahill, D. P., McLendon, R., Riggins, G. et al. (2011). Mutations in CIC and FUBP1 contribute to human oligodendroglioma. *Science* **333**, 1453-1455.
- Bocca, S. N., Muzzopappa, M., Silberstein, S. and Wappner, P. (2001). Occurrence of a putative SCF ubiquitin ligase complex in *Drosophila*. *Biochem. Biophys. Res. Commun.* **286**, 357-364.
- Boh, B. K., Smith, P. G. and Hagen, T. (2011). Neddylated-induced conformational control regulates cullin RING ligase activity in vivo. *J. Mol. Biol.* **409**, 136-145.
- Cavadini, S., Fischer, E. S., Bunker, R. D., Potenza, A., Lingaraju, G. M., Goldie, K. N., Mohamed, W. I., Faty, M., Petzold, G., Beckwith, R. E. et al. (2016). Cullin-RING ubiquitin E3 ligase regulation by the COP9 signalosome. *Nature* **531**, 598-603.
- Chamovitz, D. A. (2009). Revisiting the COP9 signalosome as a transcriptional regulator. *EMBO Rep.* **10**, 352-358.
- Choi, N., Park, J., Lee, J.-S., Yoe, J., Park, G. Y., Kim, E., Jeon, H., Cho, Y. M., Roh, T.-Y. and Lee, Y. (2015). miR-93/miR-106b/miR-375-CIC-CRABP1: a novel regulatory axis in prostate cancer progression. *Oncotarget* **6**, 23533-23547.
- Cope, G. A. and Deshaies, R. J. (2003). COP9 signalosome: a multifunctional regulator of SCF and other cullin-based ubiquitin ligases. *Cell* **114**, 663-671.
- Cope, G. A., Suh, G. S., Aravind, L., Schwarz, S. E., Zipursky, S. L., Koonin, E. V. and Deshaies, R. J. (2002). Role of predicted metalloprotease motif of Jab1/Csn5 in cleavage of Nedd8 from Cul1. *Science* **298**, 608-611.
- Diaz-Benjumea, F. J. and Hafen, E. (1994). The sevenless signalling cassette mediates *Drosophila* EGF receptor function during epidermal development. *Development* **120**, 569-578.
- Dissanayake, K., Toth, R., Blakey, J., Olsson, O., Campbell, D. G., Prescott, A. R. and MacKintosh, C. (2011). ERK/p90(RSK)/14-3-3 signalling has an impact on expression of PEA3 Ets transcription factors via the transcriptional repressor Capicua. *Biochem. J.* **433**, 515-525.
- Dressel, U., Thormeyer, D., Altincicek, B., Paululat, A., Eggert, M., Schneider, S., Tenbaum, S. P., Renkawitz, R. and Baniahmad, A. (1999). Alien, a highly conserved protein with characteristics of a corepressor for members of the nuclear hormone receptor superfamily. *Mol. Cell. Biol.* **19**, 3383-3394.
- Dubiel, D., Rockel, B., Naumann, M. and Dubiel, W. (2015). Diversity of COP9 signalosome structures and functional consequences. *FEBS Lett.* **589**, 2507-2513.
- Enchev, R. I., Scott, D. C., da Fonseca, P. C., Schreiber, A., Monda, J. K., Schulman, B. A., Peter, M. and Morris, E. P. (2012). Structural basis for a reciprocal regulation between SCF and CSN. *Cell Rep.* **2**, 616-627.
- Fang, L., Wang, X., Yamoah, K., Chen, P.-L., Pan, Z.-Q. and Huang, L. (2008). Characterization of the human COP9 signalosome complex using affinity purification and mass spectrometry. *J. Proteome Res.* **7**, 4914-4925.
- Fores, M., Ajuria, L., Samper, N., Astigarraga, S., Nieva, C., Grossman, R., Gonzalez-Crespo, S., Paroush, Z. and Jimenez, G. (2015). Origins of context-dependent gene repression by capicua. *PLoS Genet.* **11**, e1004902.
- Futran, A. S., Kyin, S., Shvartsman, S. Y. and Link, A. J. (2015). Mapping the binding interface of ERK and transcriptional repressor Capicua using photocrosslinking. *Proc. Natl. Acad. Sci. USA* **112**, 8590-8595.
- Fuzesi-Levi, M. G., Ben-Nissan, G., Bianchi, E., Zhou, H., Deery, M. J., Lilley, K. S., Levin, Y. and Sharon, M. (2014). Dynamic regulation of the COP9 signalosome in response to DNA damage. *Mol. Cell. Biol.* **34**, 1066-1076.
- Grimm, O., Sanchez Zini, V., Kim, Y., Casanova, J., Shvartsman, S. Y. and Wieschaus, E. (2012). Torso RTK controls Capicua degradation by changing its subcellular localization. *Development* **139**, 3962-3968.
- Guruharsha, K. G., Rual, J.-F., Zhai, B., Mintseris, J., Vaidya, P., Vaidya, N., Beekman, C., Wong, C., Rhee, D. Y., Cenaj, O. et al. (2011). A protein complex network of *Drosophila melanogaster*. *Cell* **147**, 690-703.
- Hazelett, D. J., Bourouis, M., Walldorf, U. and Treisman, J. E. (1998). *decapentaplegic* and *wingless* are regulated by *eyes absent* and *eyegone* and interact to direct the pattern of retinal differentiation in the eye disc. *Development* **125**, 3741-3751.
- Hunter, T. (2007). The age of crosstalk: phosphorylation, ubiquitination, and beyond. *Mol. Cell* **28**, 730-738.
- Janody, F., Lee, J. D., Jahren, N., Hazelett, D. J., Benlali, A., Miura, G. I., Draskovic, I. and Treisman, J. E. (2004). A mosaic genetic screen reveals distinct roles for *trithorax* and *Polycomb* group genes in *Drosophila* eye development. *Genetics* **166**, 187-200.
- Jarman, A. P., Sun, Y., Jan, L. Y. and Jan, Y. N. (1995). Role of the proneural gene, *atonal*, in formation of *Drosophila* chordotonal organs and photoreceptors. *Development* **121**, 2019-2030.
- Jiang, J. and Struhl, G. (1998). Regulation of the Hedgehog and Wingless signalling pathways by the F-box/WDR40-repeat protein Slimb. *Nature* **391**, 493-496.
- Jimenez, G., Shvartsman, S. Y. and Paroush, Z. (2012). The Capicua repressor—a general sensor of RTK signaling in development and disease. *J. Cell Sci.* **125**, 1383-1391.
- Lam, Y. C., Bowman, A. B., Jafar-Nejad, P., Lim, J., Richman, R., Fryer, J. D., Hyun, E. D., Duvick, L. A., Orr, H. T., Botas, J. et al. (2006). ATAXIN-1 interacts with the repressor Capicua in its native complex to cause SCA1 neuropathology. *Cell* **127**, 1335-1347.
- Lasagna-Reeves, C. A., Rousseaux, M. W., Guerrero-Munoz, M. J., Park, J., Jafar-Nejad, P., Richman, R., Lu, N., Sengupta, U., Litvinchuk, A., Orr, H. T. et al. (2015). A native interactor scaffolds and stabilizes toxic ATAXIN-1 oligomers in SCA1. *Elife* **4**.
- Lee, D. H. and Goldberg, A. L. (1998). Proteasome inhibitors: valuable new tools for cell biologists. *Trends Cell Biol.* **8**, 397-403.
- Lee, J.-H., Yi, L., Li, J., Schweitzer, K., Borgmann, M., Naumann, M. and Wu, H. (2013). Crystal structure and versatile functional roles of the COP9 signalosome subunit 1. *Proc. Natl. Acad. Sci. USA* **110**, 11845-11850.
- Legent, K., Steinhauer, J., Richard, M. and Treisman, J. E. (2012). A screen for X-linked mutations affecting *Drosophila* photoreceptor differentiation identifies Casein kinase 1 alpha as an essential negative regulator of Wingless signaling. *Genetics* **190**, 601-616.
- Li, J.-Y., Chai, B.-X., Zhang, W., Liu, Y.-Q., Ammor, J. B. and Mulholland, M. W. (2007). Ankyrin repeat and SOCS box containing protein 4 (Asb-4) interacts with GPS1 (CSN1) and inhibits c-Jun NH2-terminal kinase activity. *Cell. Signal.* **19**, 1185-1192.
- Li, W., Zang, B., Liu, C., Lu, L., Wei, N., Cao, K., Deng, X. W. and Wang, X. (2011). TSA1 interacts with CSN1/CSN and may be functionally involved in Arabidopsis seedling development in darkness. *J. Genet. Genomics* **38**, 539-546.
- Lim, B., Samper, N., Lu, H., Rushlow, C., Jimenez, G. and Shvartsman, S. Y. (2013). Kinetics of gene derepression by ERK signaling. *Proc. Natl. Acad. Sci. USA* **110**, 10330-10335.
- Lingaraju, G. M., Bunker, R. D., Cavadini, S., Hess, D., Hassiepen, U., Renatus, M., Fischer, E. S. and Thoma, N. H. (2014). Crystal structure of the human COP9 signalosome. *Nature* **512**, 161-165.
- Lyapina, S., Cope, G., Shevchenko, A., Serino, G., Tsuge, T., Zhou, C., Wolf, D. A., Wei, N., Shevchenko, A. and Deshaies, R. J. (2001). Promotion of NEDD8-CUL1 conjugate cleavage by COP9 signalosome. *Science* **292**, 1382-1385.
- McKay, M. M. and Morrison, D. K. (2007). Integrating signals from RTKs to ERK/MAPK. *Oncogene* **26**, 3113-3121.
- Merlet, J., Burger, J., Gomes, J.-E. and Pintard, L. (2009). Regulation of cullin-RING E3 ubiquitin-ligases by neddylation and dimerization. *Cell. Mol. Life Sci.* **66**, 1924-1938.
- Miura, G. I., Buglino, J., Alvarado, D., Lemmon, M. A., Resh, M. D. and Treisman, J. E. (2006). Palmitoylation of the EGFR ligand Spitz by Rasp increases Spitz activity by restricting its diffusion. *Dev. Cell* **10**, 167-176.
- Moberg, K. H., Bell, D. W., Wahrer, D. C., Haber, D. A. and Hariharan, I. K. (2001). Archipelago regulates Cyclin E levels in *Drosophila* and is mutated in human cancer cell lines. *Nature* **413**, 311-316.

- Mosadeghi, R., Reichermeier, K. M., Winkler, M., Schreiber, A., Reitsma, J. M., Zhang, Y., Stengel, F., Cao, J., Kim, M., Sweredoski, M. J. et al. (2016). Structural and kinetic analysis of the COP9-Signalosome activation and the cullin-RING ubiquitin ligase deneddylation cycle. *Elife* **5**.
- Motzny, C. K. and Holmgren, R. (1995). The *Drosophila* Cubitus interruptus protein and its role in the Wingless and Hedgehog signal transduction pathways. *Mech. Dev.* **52**, 137-150.
- Mummery-Widmer, J. L., Yamazaki, M., Stoeger, T., Novatchkova, M., Bhalerao, S., Chen, D., Dietzl, G., Dickson, B. J. and Knoblich, J. A. (2009). Genome-wide analysis of Notch signalling in *Drosophila* by transgenic RNAi. *Nature* **458**, 987-992.
- Nawrocki, S. T., Griffin, P., Kelly, K. R. and Carew, J. S. (2012). MLN4924: a novel first-in-class inhibitor of NEDD8-activating enzyme for cancer therapy. *Expert Opin. Investig. Drugs* **21**, 1563-1573.
- Okimoto, R. A., Breitenbuecher, F., Olivas, V. R., Wu, W., Gini, B., Hofree, M., Asthana, S., Hrustanovic, G., Flanagan, J., Tulpule, A. et al. (2016). Inactivation of Capicua drives cancer metastasis. *Nat. Genet.* **49**, 87-96.
- O'Neill, E. M., Rebay, I., Tjian, R. and Rubin, G. M. (1994). The activities of two Ets-related transcription factors required for *Drosophila* eye development are modulated by the Ras/MAPK pathway. *Cell* **78**, 137-147.
- Oren-Giladi, P., Krieger, O., Edgar, B. A., Chamovitz, D. A. and Segal, D. (2008). Cop9 signalosome subunit 8 (CSN8) is essential for *Drosophila* development. *Genes Cells* **13**, 221-231.
- Oron, E., Mannervik, M., Rencus, S., Harari-Steinberg, O., Neuman-Silberberg, S., Segal, D. and Chamovitz, D. A. (2002). COP9 signalosome subunits 4 and 5 regulate multiple pleiotropic pathways in *Drosophila melanogaster*. *Development* **129**, 4399-4409.
- Oron, E., Tuller, T., Li, L., Rozovsky, N., Yekutieli, D., Rencus-Lazar, S., Segal, D., Chor, B., Edgar, B. A. and Chamovitz, D. A. (2007). Genomic analysis of COP9 signalosome function in *Drosophila melanogaster* reveals a role in temporal regulation of gene expression. *Mol. Syst. Biol.* **3**, 108.
- Ou, C.-Y., Lin, Y. F., Chen, Y. J. and Chien, C. T. (2002). Distinct protein degradation mechanisms mediated by Cul1 and Cul3 controlling Ci stability in *Drosophila* eye development. *Genes Dev.* **16**, 2403-2414.
- Pan, L., Wang, S., Lu, T., Weng, C., Song, X., Park, J. K., Sun, J., Yang, Z. H., Yu, J., Tang, H. et al. (2014). Protein competition switches the function of COP9 from self-renewal to differentiation. *Nature* **514**, 233-236.
- Pick, E. and Bramasole, L. (2014). Moonlighting and pleiotropy within two regulators of the degradation machinery: the proteasome lid and the CSN. *Biochem. Soc. Trans.* **42**, 1786-1791.
- Pierce, N. W., Lee, J. E., Liu, X., Sweredoski, M. J., Graham, R. L., Larimore, E. A., Rome, M., Zheng, N., Clurman, B. E., Hess, S. et al. (2013). Cnd1 promotes assembly of new SCF complexes through dynamic exchange of F box proteins. *Cell* **153**, 206-215.
- Richardson, H., O'Keefe, L. V., Marty, T. and Saint, R. (1995). Ectopic cyclin E expression induces premature entry into S phase and disrupts pattern formation in the *Drosophila* eye imaginal disc. *Development* **121**, 3371-3379.
- Roch, F., Jimenez, G. and Casanova, J. (2002). EGFR signalling inhibits Capicua-dependent repression during specification of *Drosophila* wing veins. *Development* **129**, 993-1002.
- Rozen, S., Fuzesi-Levi, M. G., Ben-Nissan, G., Mizrahi, L., Gabashvili, A., Levin, Y., Ben-Dor, S., Eisenstein, M. and Sharon, M. (2015). CSNAP is a stoichiometric subunit of the COP9 signalosome. *Cell Rep.* **13**, 585-598.
- Saha, A. and Deshaies, R. J. (2008). Multimodal activation of the ubiquitin ligase SCF by Nedd8 conjugation. *Mol. Cell* **32**, 21-31.
- Schutz, A. K., Hennes, T., Jumpertz, S., Fuchs, S. and Bernhagen, J. (2012). Role of CSN5/JAB1 in Wnt/beta-catenin activation in colorectal cancer cells. *FEBS Lett.* **586**, 1645-1651.
- Schweitzer, R., Shaharabany, M., Seger, R. and Shilo, B. Z. (1995). Secreted Spitz triggers the DER signaling pathway and is a limiting component in embryonic ventral ectoderm determination. *Genes Dev.* **9**, 1518-1529.
- Singer, R., Atar, S., Atias, O., Oron, E., Segal, D., Hirsch, J. A., Tuller, T., Orian, A. and Chamovitz, D. A. (2014). *Drosophila* COP9 signalosome subunit 7 interacts with multiple genomic loci to regulate development. *Nucleic Acids Res.* **42**, 9761-9770.
- Soucy, T. A., Smith, P. G., Milhollen, M. A., Berger, A. J., Gavin, J. M., Adhikari, S., Brownell, J. E., Burke, K. E., Cardin, D. P., Critchley, S. et al. (2009). An inhibitor of NEDD8-activating enzyme as a new approach to treat cancer. *Nature* **458**, 732-736.
- Suh, G. S., Poeck, B., Chouard, T., Oron, E., Segal, D., Chamovitz, D. A. and Zipursky, S. L. (2002). *Drosophila* JAB1/CSN5 acts in photoreceptor cells to induce glial cells. *Neuron* **33**, 35-46.
- Sun, Y., Wilson, M. P. and Majerus, P. W. (2002). Inositol 1,3,4-trisphosphate 5/6-kinase associates with the COP9 signalosome by binding to CSN1. *J. Biol. Chem.* **277**, 45759-45764.
- Tseng, A. S., Tapon, N., Kanda, H., Cigizoglu, S., Edelmann, L., Pellock, B., White, K. and Hariharan, I. K. (2007). Capicua regulates cell proliferation downstream of the receptor tyrosine kinase/ras signaling pathway. *Curr. Biol.* **17**, 728-733.
- Tsuge, T., Matsui, M. and Wei, N. (2001). The subunit 1 of the COP9 signalosome suppresses gene expression through its N-terminal domain and incorporates into the complex through the PCI domain. *J. Mol. Biol.* **305**, 1-9.
- Tsuge, T., Menon, S., Tong, Y. and Wei, N. (2011). CSN1 inhibits c-Jun phosphorylation and down-regulates ectopic expression of JNK1. *Protein Cell* **2**, 423-432.
- Wang, X., Kang, D., Feng, S., Serino, G., Schwechheimer, C. and Wei, N. (2002). CSN1 N-terminal-dependent activity is required for *Arabidopsis* development but not for Rub1/Nedd8 deconjugation of cullins: a structure-function study of CSN1 subunit of COP9 signalosome. *Mol. Biol. Cell* **13**, 646-655.
- Wei, N. and Deng, X. W. (2003). The COP9 signalosome. *Annu. Rev. Cell Dev. Biol.* **19**, 261-286.
- Welcker, M. and Clurman, B. E. (2008). FBW7 ubiquitin ligase: a tumour suppressor at the crossroads of cell division, growth and differentiation. *Nat. Rev. Cancer* **8**, 83-93.
- Worby, C. A., Simonson-Leff, N. and Dixon, J. E. (2001). RNA interference of gene expression (RNAi) in cultured *Drosophila* cells. *Sci. STKE* **2001**, pl1.
- Wu, J. T., Lin, H. C., Hu, Y. C. and Chien, C. T. (2005). Neddylation and deneddylation regulate Cul1 and Cul3 protein accumulation. *Nat. Cell Biol.* **7**, 1014-1020.
- Wu, J.-T., Lin, W.-H., Chen, W.-Y., Huang, Y.-C., Tang, C.-Y., Ho, M. S., Pi, H. and Chien, C.-T. (2011). CSN-mediated deneddylation differentially modulates Ci (155) proteolysis to promote Hedgehog signalling responses. *Nat. Commun.* **2**, 182.
- Wu, K., Chong, R. A., Yu, Q., Bai, J., Spratt, D. E., Ching, K., Lee, C., Miao, H., Tappin, I., Hurwitz, J. et al. (2016). Suramin inhibits cullin-RING E3 ubiquitin ligases. *Proc. Natl. Acad. Sci. USA* **113**, E2011-E2018.
- Yang, L. and Baker, N. E. (2003). Cell cycle withdrawal, progression, and cell survival regulation by EGFR and its effectors in the differentiating *Drosophila* eye. *Dev. Cell* **4**, 359-369.
- Yang, L., Paul, S., Trieu, K. G., Dent, L. G., Froidi, F., Fores, M., Webster, K., Siegfried, K. R., Kondo, S., Harvey, K. et al. (2016). Minibrain and Wings apart control organ growth and tissue patterning through down-regulation of Capicua. *Proc. Natl. Acad. Sci. USA* **113**, 10583-10588.
- Zhou, C., Wee, S., Rhee, E., Naumann, M., Dubiel, W. and Wolf, D. A. (2003). Fission yeast COP9/signalosome suppresses cullin activity through recruitment of the deubiquitylating enzyme Ubp12p. *Mol. Cell* **11**, 927-938.
